# Supplementary material for: Insight into the structural and electrochemical properties of the interface between a Na6SOI2 solid electrolyte and a metallic Na anode
Source: Royal Society of Chemistry journal article supplement (doi:10.1039/d2cp05290c), 2023-01-01
Supplement: d2cp05290c1.pdf [file d2cp05290c1.pdf]

# Supplemental Material – Insight into structural and electrochemical properties of interface between $\text{Na}_6\text{SOI}_2$ solid electrolyte and metallic Na anode

Song-Hyok Choe\*, Won-Hyok Hong, Kum-Chol Kim, Chol-Jun Yu†

*Chair of Computational Materials Design, Faculty of Materials Science, Kim Il Sung University,  
Ryongnam-Dong, Taesong District, Pyongyang, PO Box 76, Democratic People's Republic of Korea*

## Structural Modeling

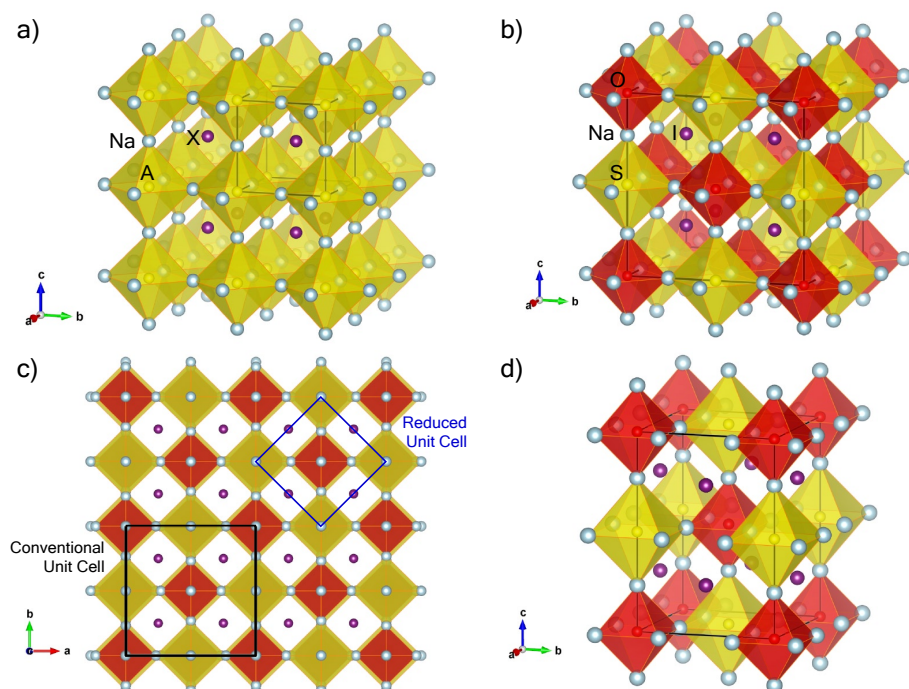

Figure S1. Polyhedral crystal structures of (a) Na-rich anti-perovskite (NaRAP) with general formula of  $\text{Na}_3\text{AX}$ , (b) Na-rich double anti-perovskite (NaRDAP)  $\text{Na}_6\text{SOI}_2$ , (c) Top-view of  $\text{Na}_6\text{SOI}_2$  conventional and reduced unit cells and (d)  $\text{Na}_6\text{SOI}_2$  reduced unit cell

\*sh.choi0220@ryongnamsan.edu.kp

†cj.yu@ryongnamsan.edu.kp

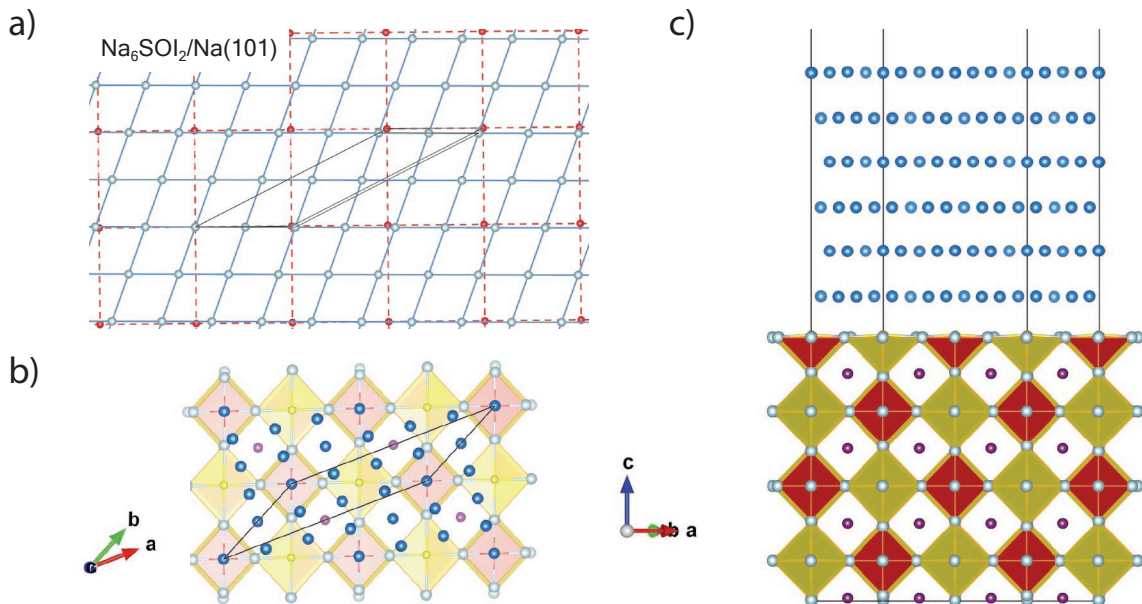

Figure S2. (a) Bravais lattices of  $\text{Na}_6\text{SOI}_2$  and  $\text{Na}(001)$  surfaces showing the coincidence lattice model with minor mismatch. (b) Polyhedral top-view and (c) side-view of  $[\text{NSO}]/\text{Na}(001)$  interface model.

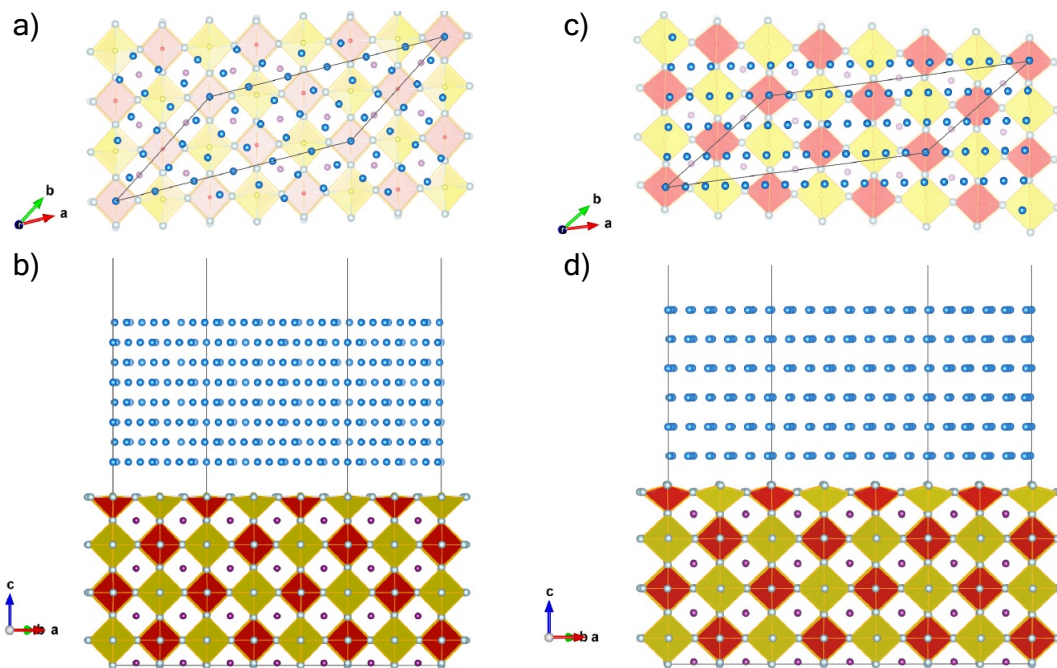

Figure S3. Polyhedral structures of interface models for SIESTA simulation –  $[\text{NSO}]/\text{Na}(001)$  : (a) top-view and (b) side-view, and  $[\text{NSO}]/\text{Na}(101)$  : (c) top-view and (d) side-view.

## Structural Properties

Table S1. Lattice constants of the reduced unit cell of  $\text{Na}_6\text{SOI}_2$  in bulk phase calculated by several codes - VASP, QE and SIESTA. Calculation results of this work are compared with those of Ref.<sup>a</sup> obtained from calculation by VASP(PBE).

| Code(XC-func.)                | $a = b(\text{\AA})$ | $c(\text{\AA})$ | $\alpha = \beta = \gamma(^{\circ})$ | $V(\text{\AA}^3)$ | $r_{a,b}(\%)$ | $r_c(\%)$ | $r_V(\%)$ |
|-------------------------------|---------------------|-----------------|-------------------------------------|-------------------|---------------|-----------|-----------|
| <b>VASP (PBE)<sup>a</sup></b> | <b>7.04</b>         | <b>9.96</b>     | <b>90.00</b>                        | <b>493.60</b>     | —             | —         | —         |
| QE (PBE-sol)                  | 7.00                | 9.90            | 90.00                               | 484.58            | -0.59         | -0.65     | -1.83     |
| QE (PBE)                      | 7.09                | 10.03           | 90.00                               | 504.82            | 0.76          | 0.74      | 2.27      |
| SIESTA (PBE)                  | 7.17                | 10.15           | 90.00                               | 522.18            | 1.90          | 1.87      | 5.79      |

<sup>a</sup>Y. Yu, Z. Wang and G. Shao, J. Mater. Chem. A, 2018, 6, 19843-19852

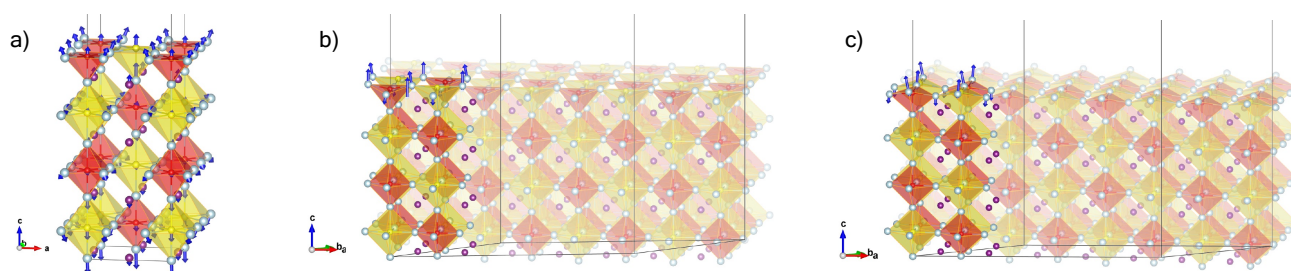

Figure S4. Structural optimization results by SIESTA calculations. (a) Polyhedral view of optimized structural models for (a)  $\text{Na}_6\text{SOI}_2$  surface model, and the strained ones of coincidence lattice with (b)  $\text{Na}(001)$  surface and (c)  $\text{Na}(101)$  surface. Blue arrows denote the displacement of the atoms.

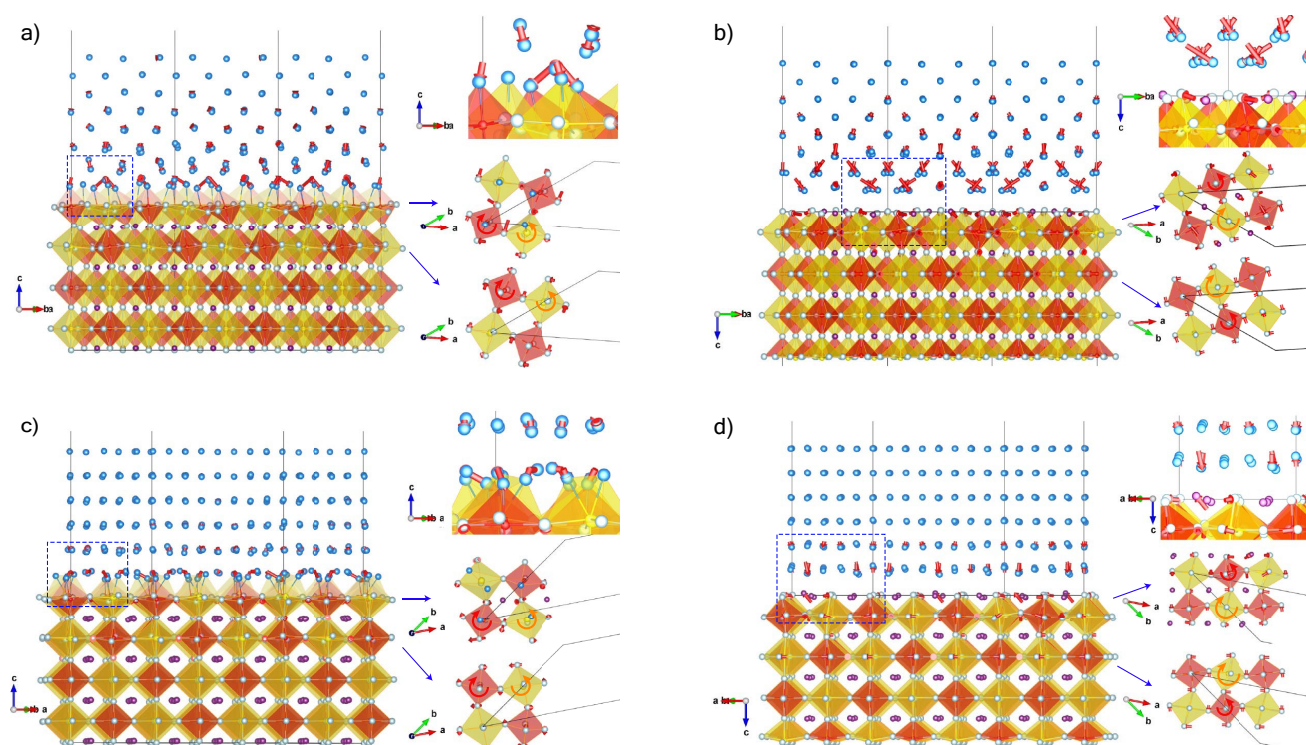

Figure S5. Structural optimization results by SIESTA calculations for interface models – (a)  $[\text{NSO}]/\text{Na}(001)$ , (b)  $[\text{NI}]/\text{Na}(001)$ , (c)  $[\text{NSO}]/\text{Na}(101)$ , and (d)  $[\text{NI}]/\text{Na}(101)$ . Red arrows denote the displacement of the atoms, while orange and red arrows depict the rotation of S- and O-centered polyhedra, respectively.

## Ion Migration

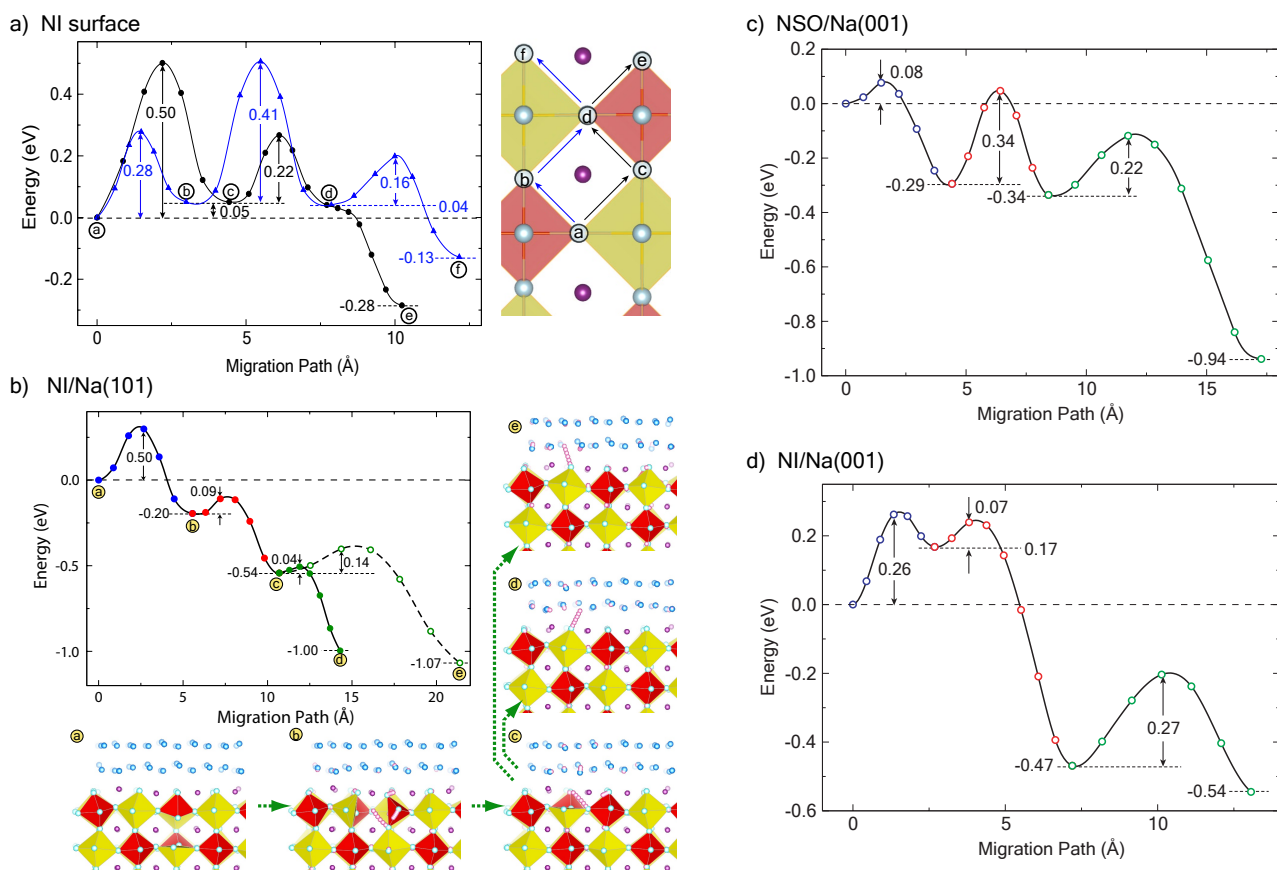

Figure S6. Energy profiles for  $V_{Na}$  migration near (a) NI surface termination, (b) NI/Na(101), (c) NSO/Na(001) and (d) NI/Na(001) interfaces. The migration paths are indicated in the right panel of (a) and the snapshots of  $V_{Na}$  migration in (b) NI/Na(101) interface model are shown in the surrounding where the light pink balls illustrate the migration paths of Na.

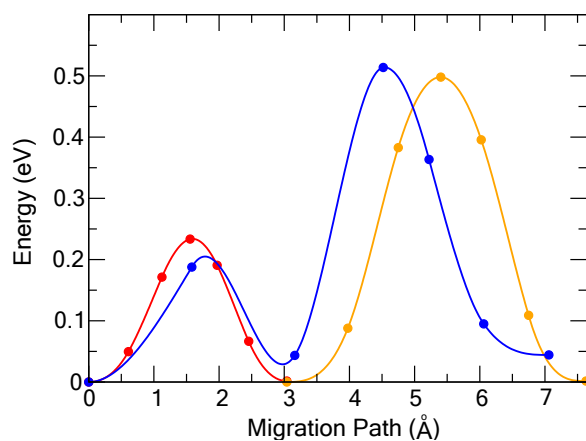

Figure S7. Migration energy profiles of  $V_{Na}$  for concurrent migration scheme (blue curve) and sequential migration scheme (red and orange curves).

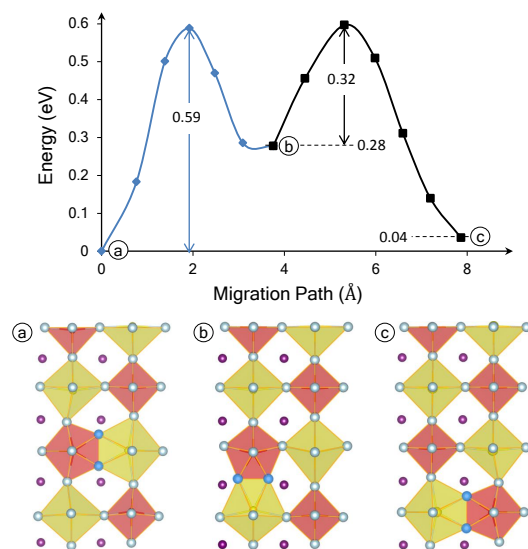

Figure S8. Migration energy profiles of  $\text{Na}_i$  for rotational scheme and the snapshots of migration.

## Electronic Structures

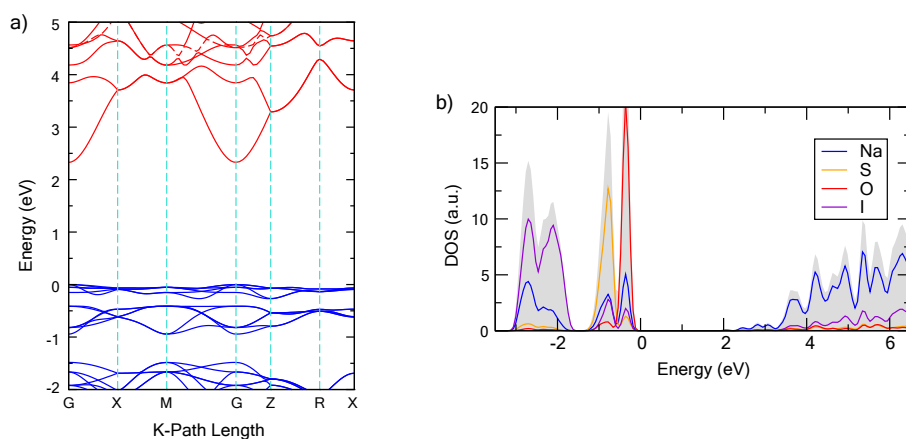

Figure S9. Electronic structures of  $\text{Na}_6\text{SOI}_2$  in bulk phase; (a) band structure and (b) atom-resolved PDOS.

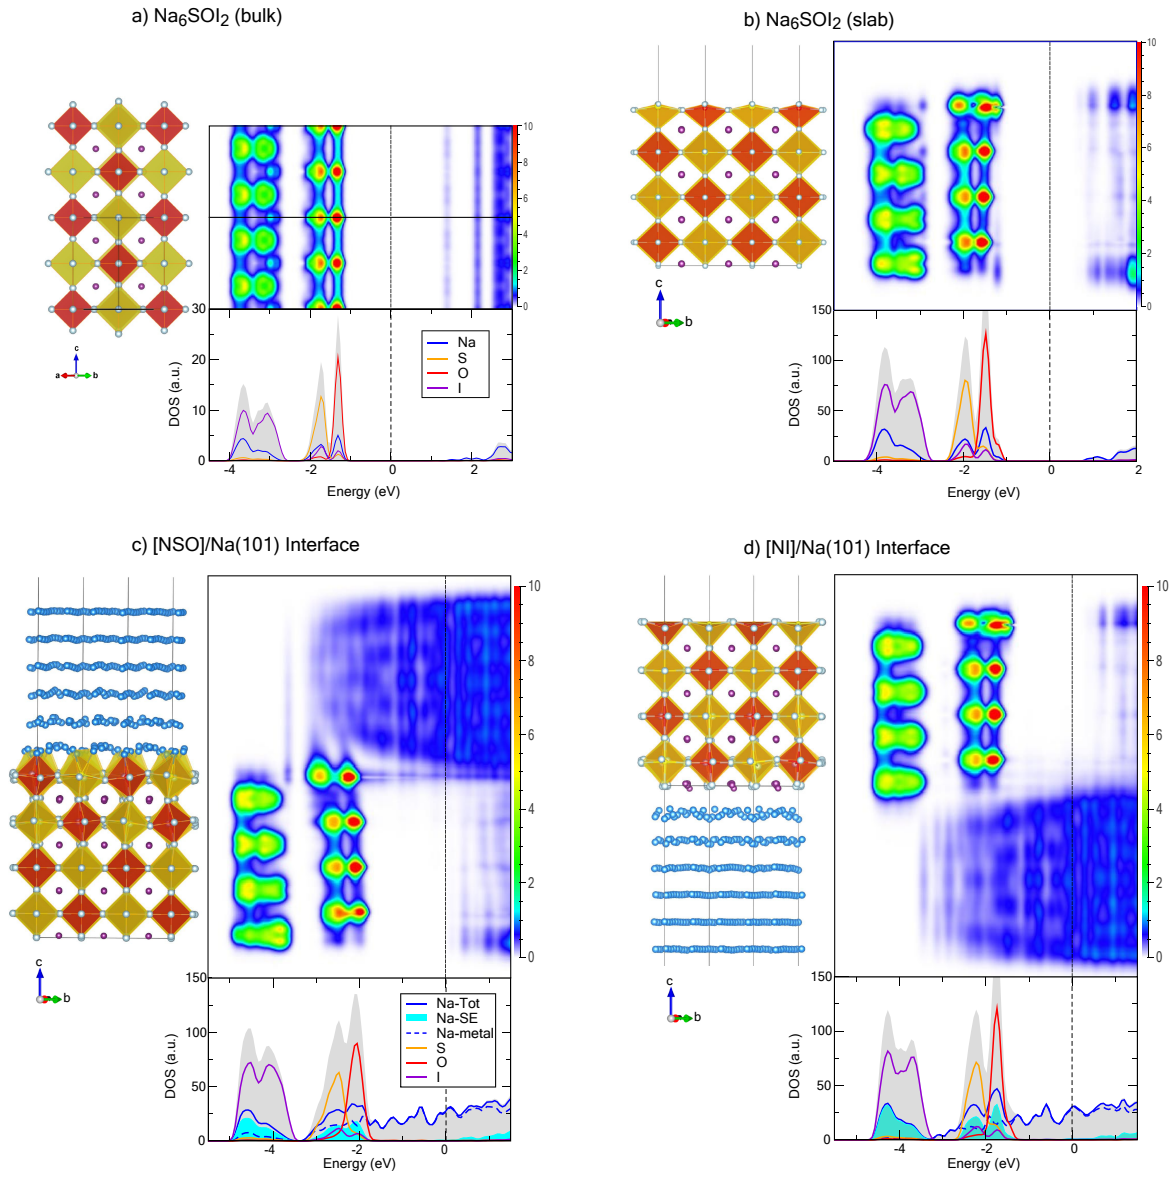

Figure S10. Atom-resolved PDOS and LDOS along  $c$ -direction integrated over  $a - b$  plane; (a)  $\text{Na}_6\text{SOI}_2$  in bulk phase (b)  $\text{Na}_6\text{SOI}_2$  surface model, (c) [NSO]/Na(101) interface model, and (d) [NI]/Na(001) interface model. Vertical ( $c$ -direction) and horizontal (energy) axes of the LDOS graphs are shared by the structural model in the left and PDOS graph at the bottom, and the Fermi level is fixed as 0 eV.
